# Supplementary material
Source: publisher site journal article supplement (http://www.degruyter.com/publication/journal_key/MGMC/downloadAsset/MGMC_Article%20Processing%20Charges.pdf)
Supplement: Supplementary file 1 [file MGMC_Article%20Processing%20Charges.pdf]

## ARTICLE PROCESSING CHARGES

EFFECTIVE OCTOBER 2023

---

In order to sustain the production of our fully refereed open access journal, each article accepted for publication in Main Group Metal Chemistry is subject to Article Processing Charges. This fee is used to cover the costs of the peer- review process, professional typesetting, and copyediting, as well as online hosting, long-term preservation, distribution to libraries and content aggregators worldwide, and extensive promotion to potential readers. Please note, that there are no charges for manuscript submissions (fee is valid only for accepted manuscripts after the peer-review process).

Editors and reviewers are not involved in author payment process and do not discuss charges with authors. The ability to pay does not influence whether or not a manuscript is accepted for publication.

Information regarding payment (methods of payment, bank account number etc.) of these charges will be provided following acceptance for publication.

Articles Processing Charges are collected via RightsLink system (provided by Copyright Clearance Center). The payment can be made in EUR, USD, or GBP, and may be subject to VAT when applicable.

## WAIVER POLICIES

If the submitting author is affiliated with an organization which has an open access agreement with De Gruyter, the article processing charges (APCs) may be covered or discounted. Moreover, all authors can apply for a discount or a waiver during the submission process. Authors are asked to contact the journal Editorial Office before, or straight after submitting their article.

All inquiries concerning Article Processing Charges should be addressed before submitting a paper to the Managing Editor at the email address: [MGMC.editorial@degruyter.com](mailto:MGMC.editorial@degruyter.com).

## FUNDING OPPORTUNITIES

Authors who are looking for funds to support the payment of Article Processing Charges have a number of options to consider. For details visit our [website](#).

## EDITORIAL OFFICE

Managing Editor  
Izabela Żarczyńska  
De Gruyter Poland Ltd.  
Bogumiła Zuga 32A  
01-811 Warsaw / Poland  
e-mail: [Izabela.Zarczynska@degruyter.com](mailto:Izabela.Zarczynska@degruyter.com)  
Main Group Metal Chemistry & beyond: [www.degruyter.com/mgmc](http://www.degruyter.com/mgmc)
